# Supplementary material for: Dipeptide self-assembly into water-channels and gel biomaterial
Source: Royal Society of Chemistry journal article supplement (doi:10.1039/d2ob00622g), 2022-01-01
Supplement: d2ob00622g1.pdf [file d2ob00622g1.pdf]

## Supporting Information

### **Dipeptide self-assembly into water-channels and gel biomaterial**

Ottavia Bellotto,<sup>a</sup> Giovanni Pierri,<sup>b</sup> Petr Rozhin,<sup>a</sup> Maurizio Polentarutti,<sup>c</sup> Slavko Kralj,<sup>d,e</sup> Paola D'Andrea,<sup>f</sup> Consiglia Tedesco,<sup>\*b</sup> and Silvia Marchesan <sup>\*a</sup>

\* [ctedesco@unisa.it](mailto:ctedesco@unisa.it), [smarchesan@units.it](mailto:smarchesan@units.it)

<sup>a</sup> University of Trieste, Chem. Pharm. Sc. Dept., Via L. Giorgieri 1, 34127 Trieste, Italy.

<sup>b</sup> University of Salerno, Chemistry and Biology Dept. "A. Zambelli", Via Giovanni Paolo II 132, 84084 Fisciano (SA), Italy.

<sup>c</sup> Elettra-Sincrotrone Trieste, S.S. 114 km 163.5, Basovizza, 34149 Trieste, Italy

<sup>d</sup> Jožef Stefan Institute, Materials Synthesis Dept., Jamova 39, 1000 Ljubljana, Slovenia

<sup>e</sup> University of Ljubljana, Pharmaceutical Technology Dept., Faculty of Pharmacy, Aškerčeva 7, 1000 Ljubljana, Slovenia

<sup>f</sup> University of Trieste, Life Sciences Dept., Via L. Giorgieri 5, 34127 Trieste, Italy

## Table of Contents

|                                          |    |
|------------------------------------------|----|
| S1. D-Phe-L-Val spectroscopic data.....  | 2  |
| S2. D-Val-L-Phe spectroscopic data.....  | 5  |
| S3. HPLC traces.....                     | 8  |
| S4. CD spectra.....                      | 8  |
| S5. Thioflavin T fluorescence assay..... | 9  |
| S6. Single-crystal XRD data.....         | 10 |
| S7. Oscillatory rheometry data.....      | 14 |
| S8. Thermoreversibility test.....        | 14 |

## S1. D-Phe-L-Val spectroscopic data

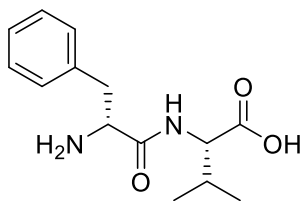

**<sup>1</sup>H NMR** (400 MHz, DMSO-*d*<sub>6</sub>, TMS)  $\delta$  (ppm): 8.59 (d,  $J = 8.6$  Hz, 1H), 7.36 – 7.23 (m, 5H), 4.23 – 4.13 (m, 2H), 3.05 (dd,  $J = 13.8, 6.7$  Hz, 1H), 2.97 (dd,  $J = 13.8, 7.9$  Hz, 1H), 2.01 – 1.88 (m, 1H), 0.75 (d,  $J = 6.8$  Hz, 3H), 0.73 (d,  $J = 6.8$  Hz, 3H). **<sup>13</sup>C NMR** (100 MHz, DMSO-*d*<sub>6</sub>, TMS)  $\delta$  (ppm): 172.4, 168.3 (2 x CO); 134.9, 129.5, 128.5, 127.1 (Ar); 57.3, 53.2 (2 x  $\alpha$ C); 37.6, 30.1 (2 x  $\beta$ C); 18.8, 17.7 (2 x  $\gamma$ C). **MS (ESI)**:  $m/z$  265.1 (M+H)<sup>+</sup>, 287.1 (M+Na)<sup>+</sup>, 263 (M-H)<sup>-</sup>.

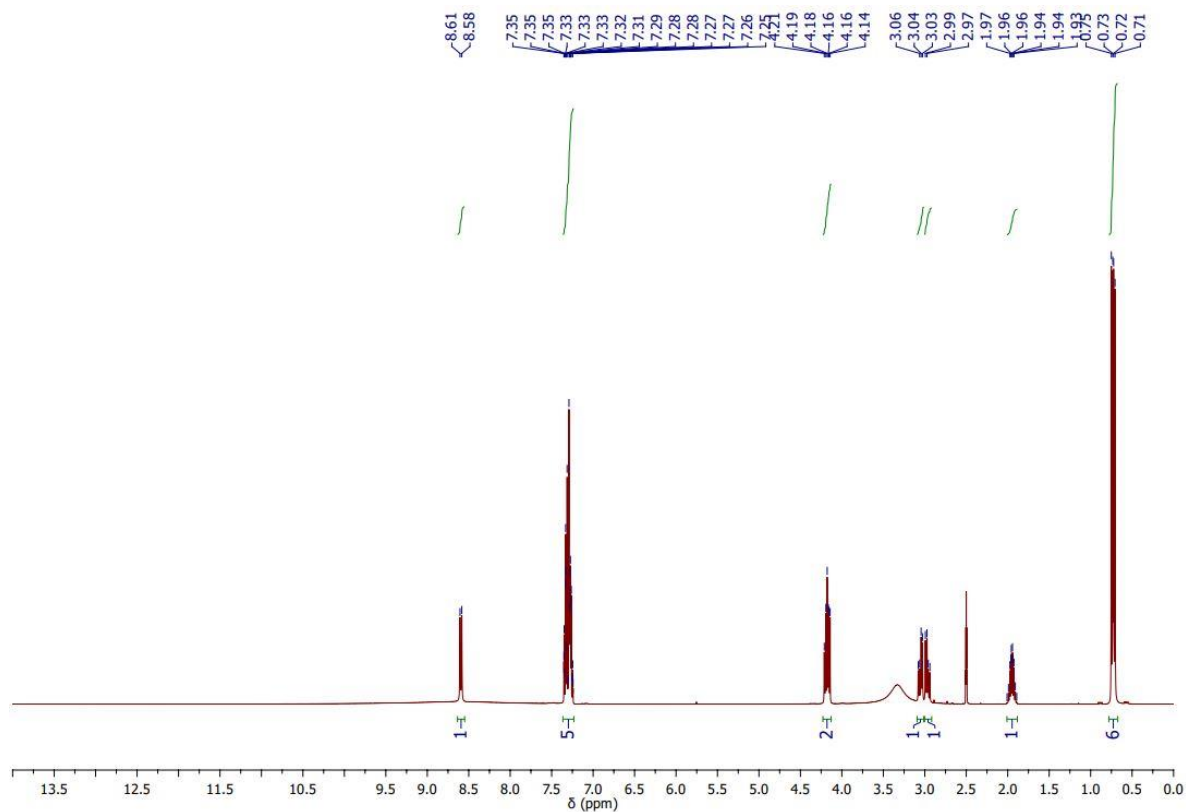

**Fig. S1.** <sup>1</sup>H-NMR spectrum of D-Phe-L-Val.

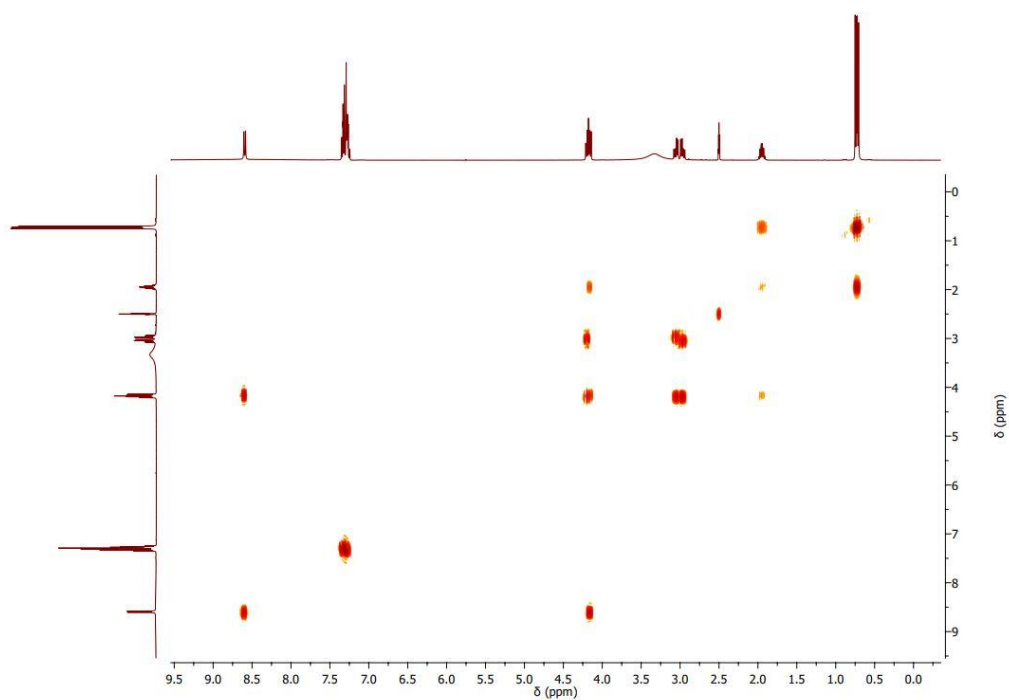

**Fig. S2.** gCOSY 2D-NMR spectrum of D-Phe-L-Val.

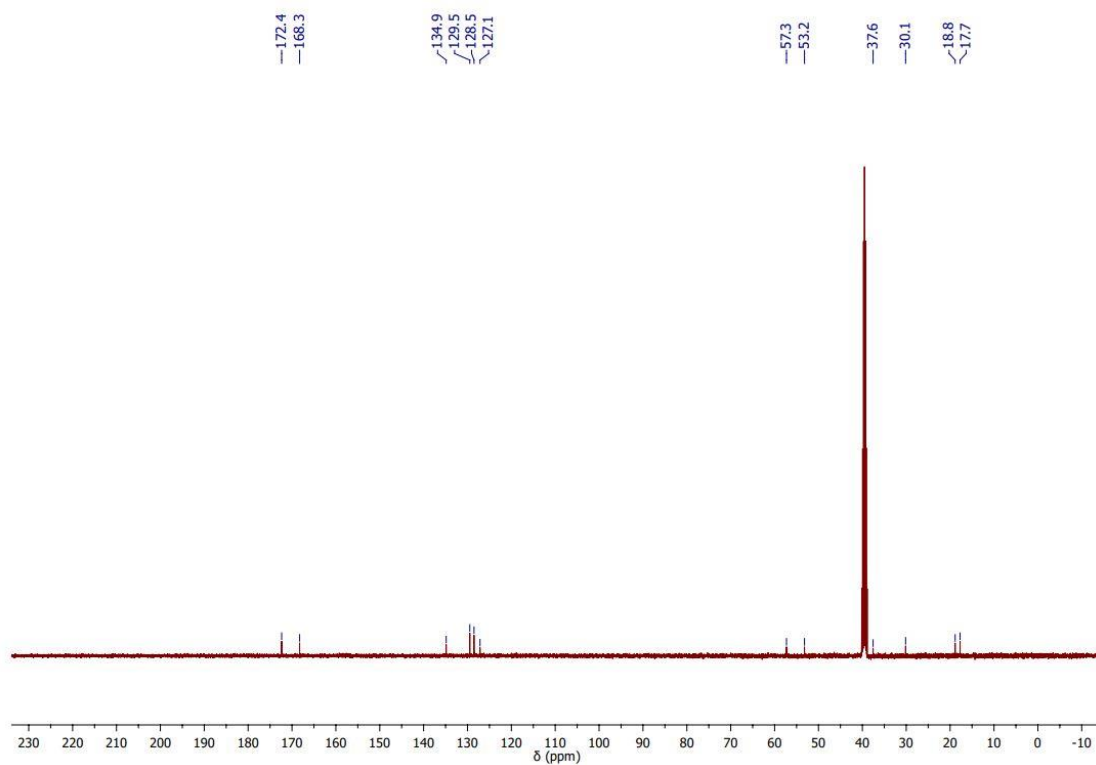

**Fig. S3.**  $^{13}\text{C}$ -NMR spectrum of D-Phe-L-Val.

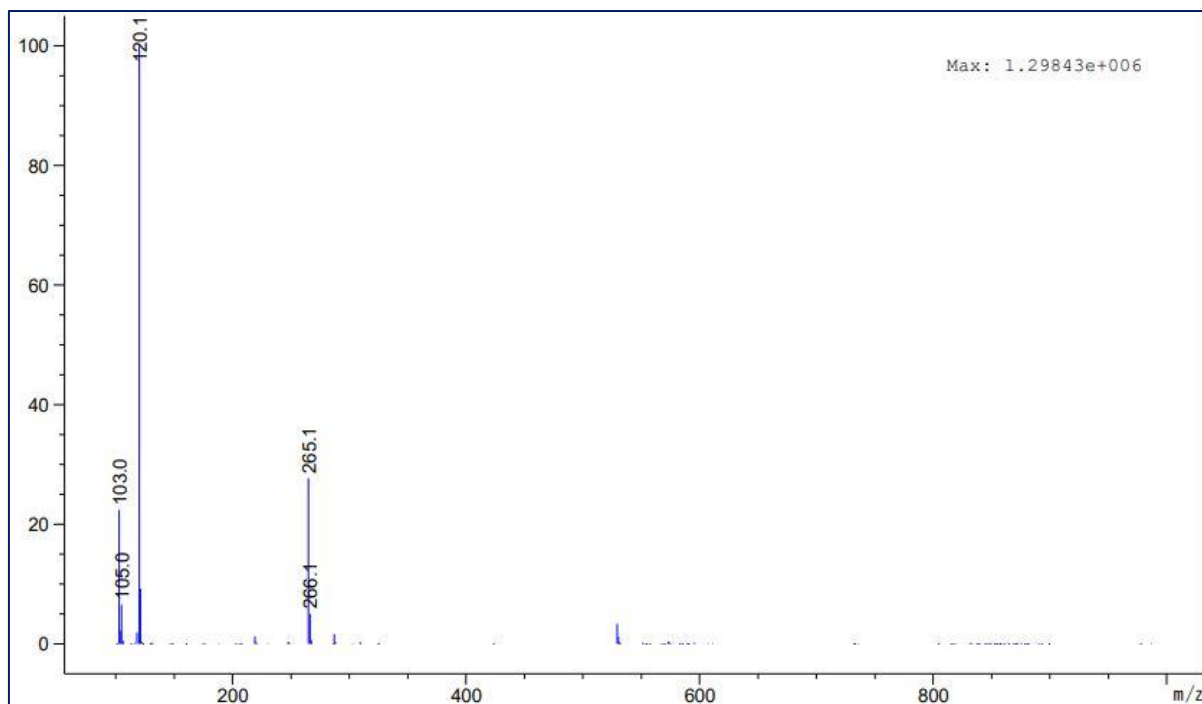

**Fig. S4.** ESI-MS spectrum of D-Phe-L-Val (positive ion mode).

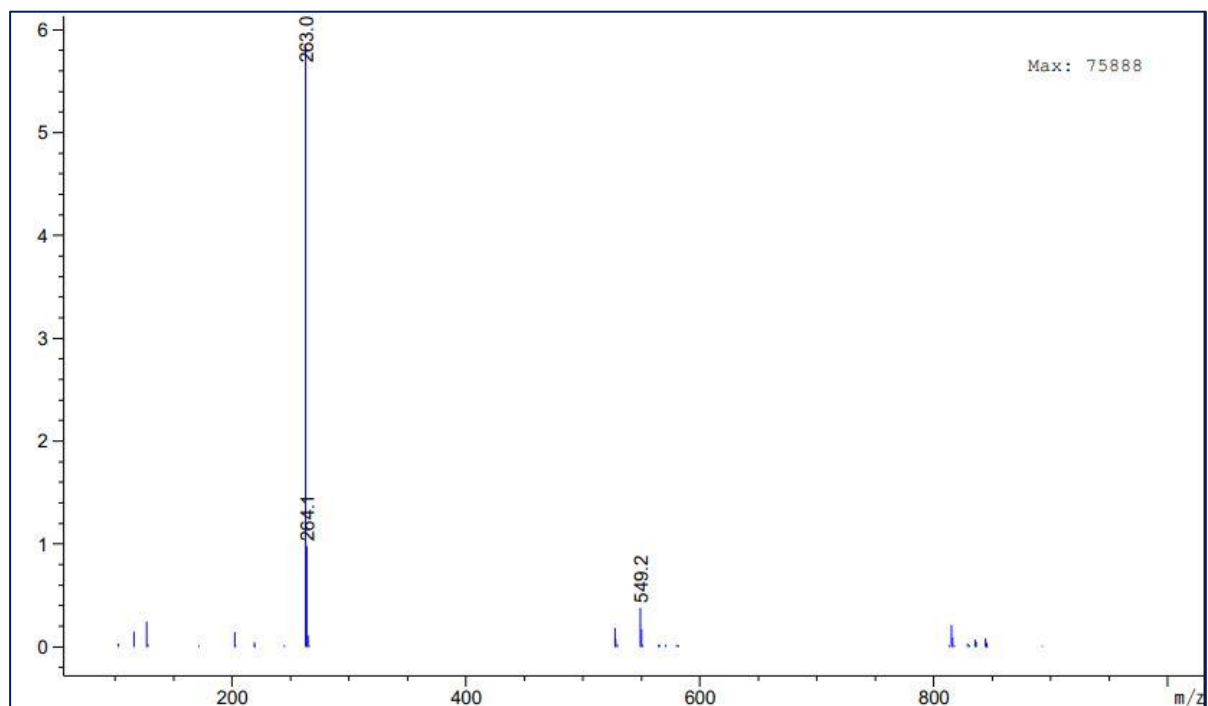

**Fig. S5.** ESI-MS spectrum of D-Phe-L-Val (negative ion mode).

## S2. D-Val-L-Phe spectroscopic data

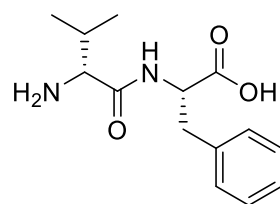

**$^1\text{H}$  NMR** (400 MHz, DMSO- $d_6$ , TMS)  $\delta$  (ppm): 8.69 (d,  $J = 8.4$  Hz, 1H), 7.31 – 7.15 (m, 5H), 4.59 (ddd,  $J = 10.3, 8.4, 4.4$  Hz, 1H), 3.57 (d,  $J = 4.6$  Hz, 1H), 3.16 (dd,  $J = 13.9, 4.4$  Hz, 1H), 2.83 (dd,  $J = 13.9, 10.4$  Hz, 1H), 1.94 – 1.80 (m, 1H), 0.72 (d,  $J = 6.9$  Hz, 3H), 0.51 (d,  $J = 7.0$  Hz, 3H).  **$^{13}\text{C}$  NMR** (100 MHz, DMSO- $d_6$ , TMS)  $\delta$  (ppm): 172.6, 167.9 (2 x CO); 137.3, 129.1, 128.2, 126.5 (Ar); 57.3, 53.5 (2 x  $\alpha\text{C}$ ); 37.1, 29.7 (2 x  $\beta\text{C}$ ); 18.3, 16.6 (2 x  $\gamma\text{C}$ ). **MS (ESI):**  $m/z$  265.1 (M+H) $^+$ , 287.1 (M+Na) $^+$ , 263 (M-H) $^-$ .

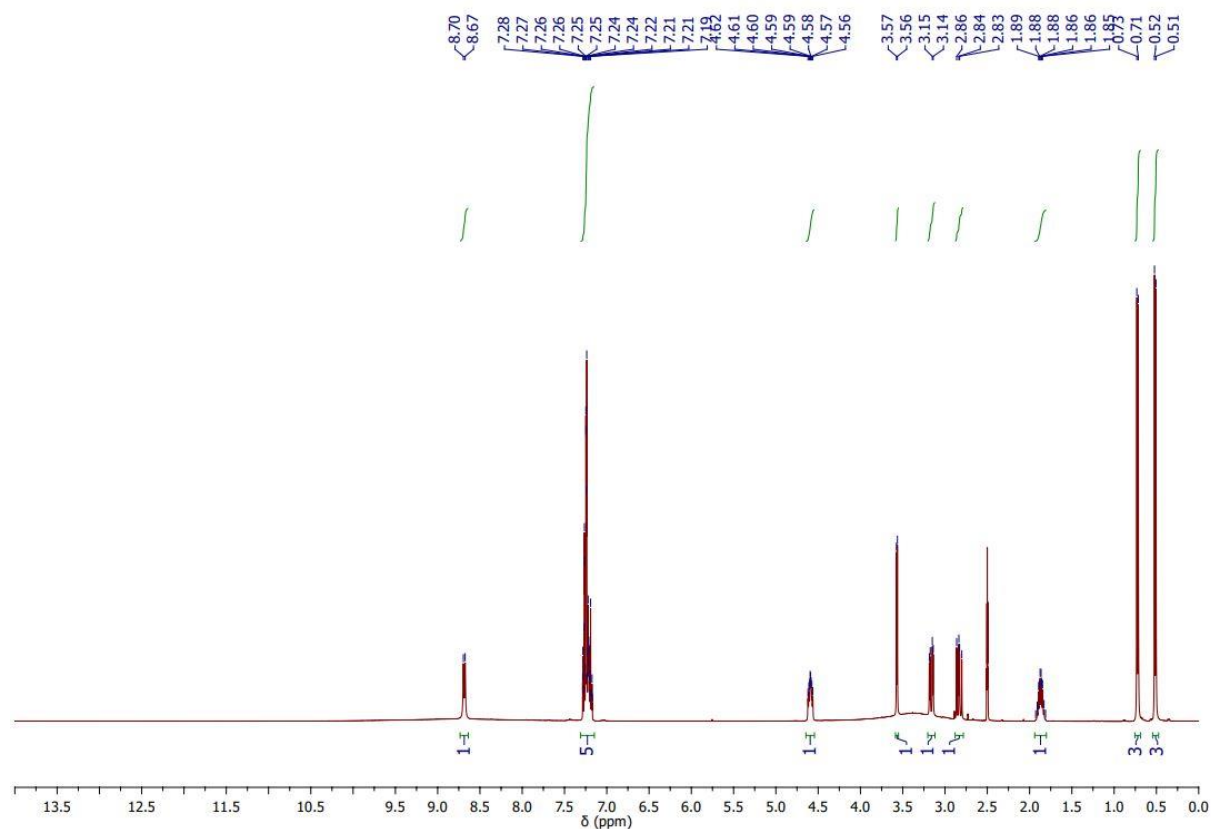

Fig. S6.  $^1\text{H}$ -NMR spectrum of D-Val-L-Phe.

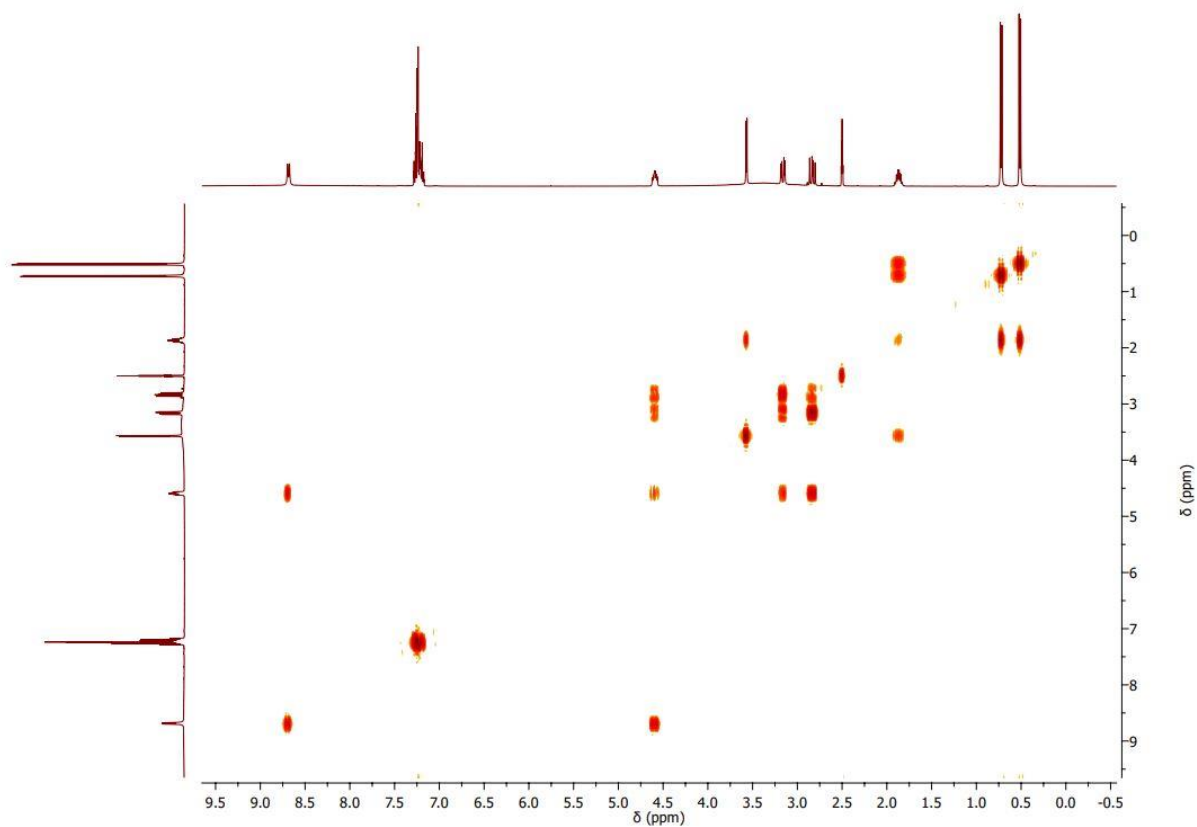

Fig. S7. gCOSY 2D-NMR spectrum of D-Val-L-Phe.

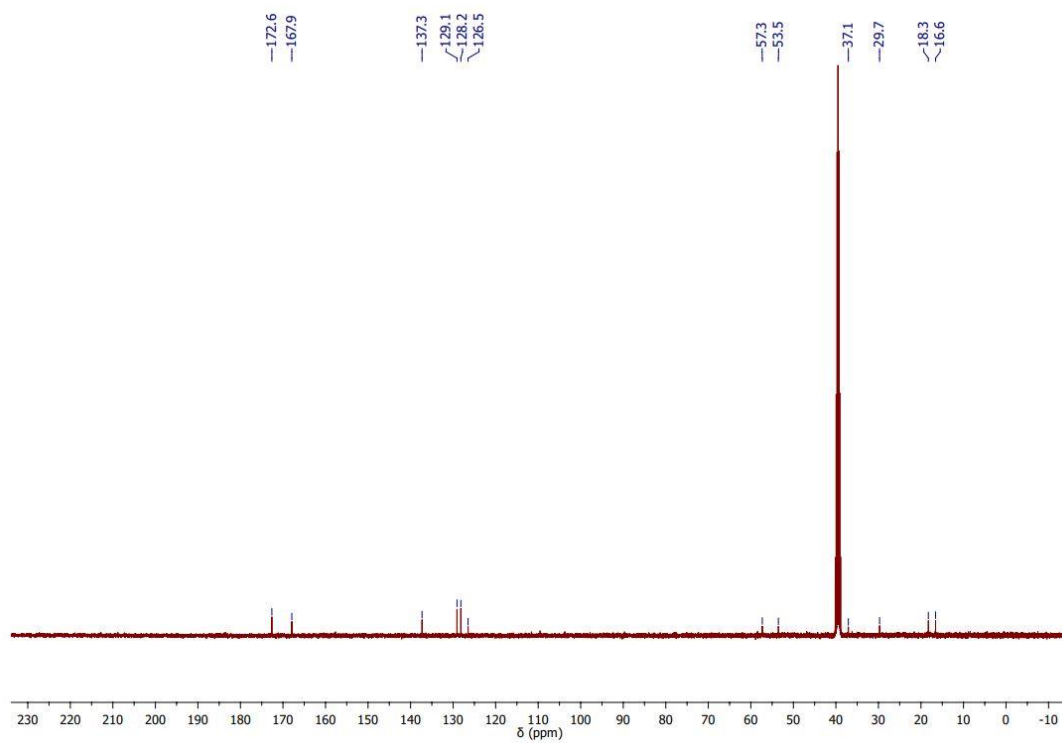

Fig. S8.  $^{13}\text{C}$ -NMR spectrum of D-Val-L-Phe.

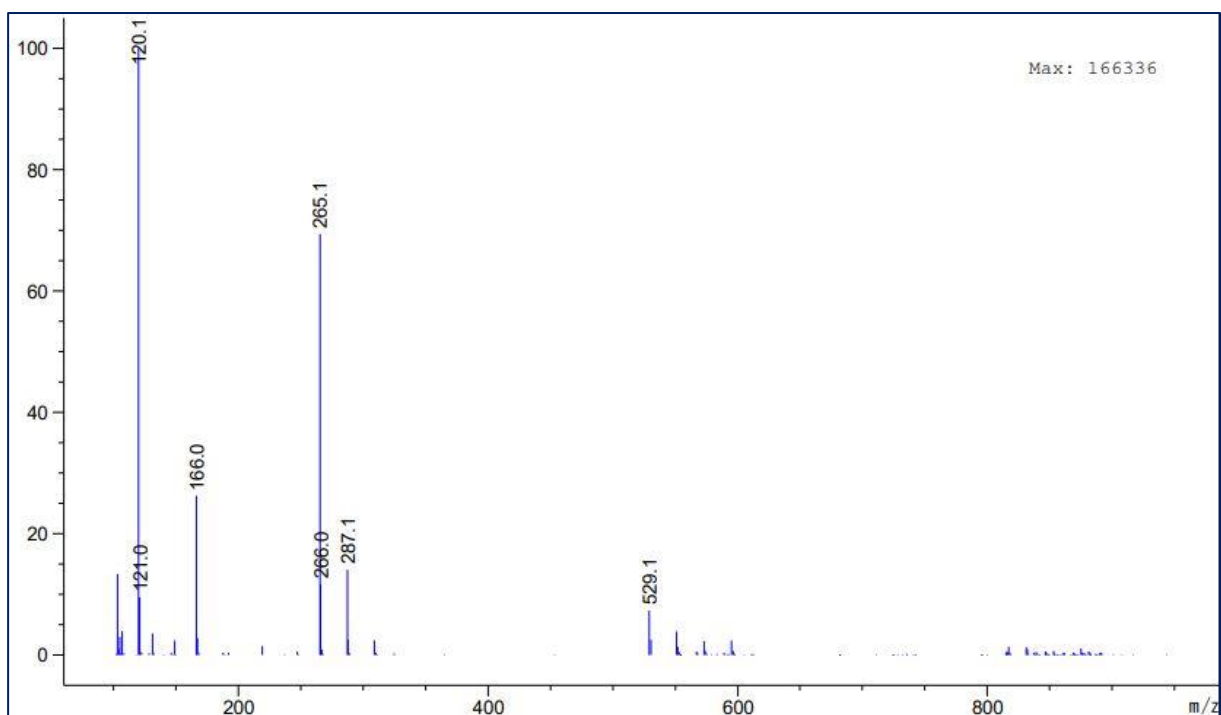

**Fig. S9.** ESI-MS spectrum of D-Val-L-Phe (positive ion mode).

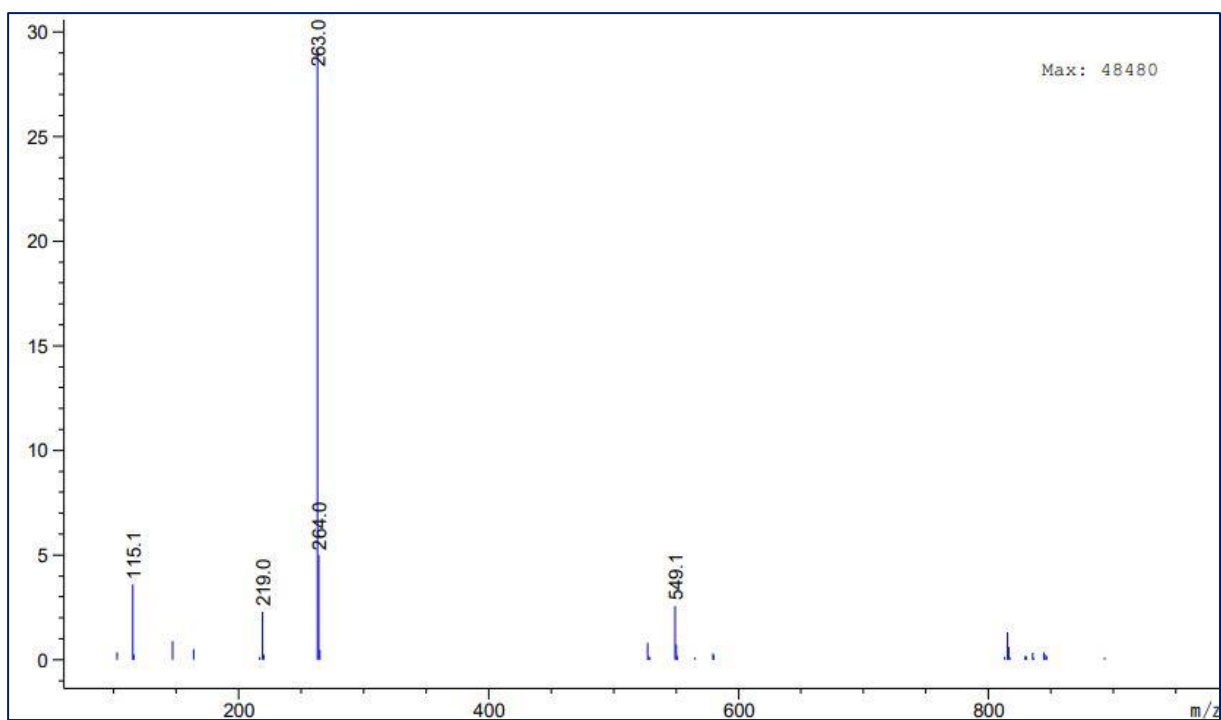

**Fig. S10.** ESI-MS spectrum of D-Val-L-Phe (negative ion mode).

### S3. HPLC traces

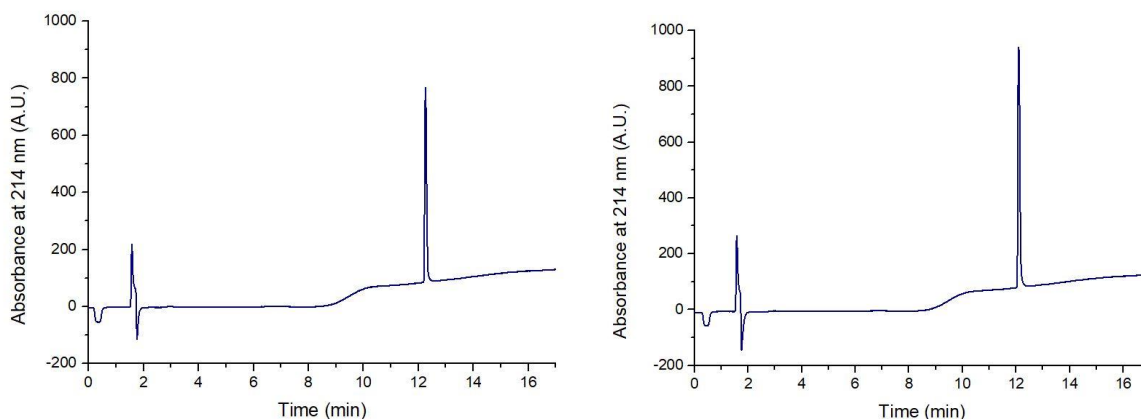

**Fig. S11.** HPLC traces of D-Phe-L-Val (left) and D-Val-L-Phe (right) in water/MeCN gradient system from 5% of MeCN with 0.1% formic acid over 17 min (C-18 Luna Column, 5  $\mu$ m, 100  $\text{\AA}$ , 150 x 2 mm, Phenomenex).

### S4. CD spectra

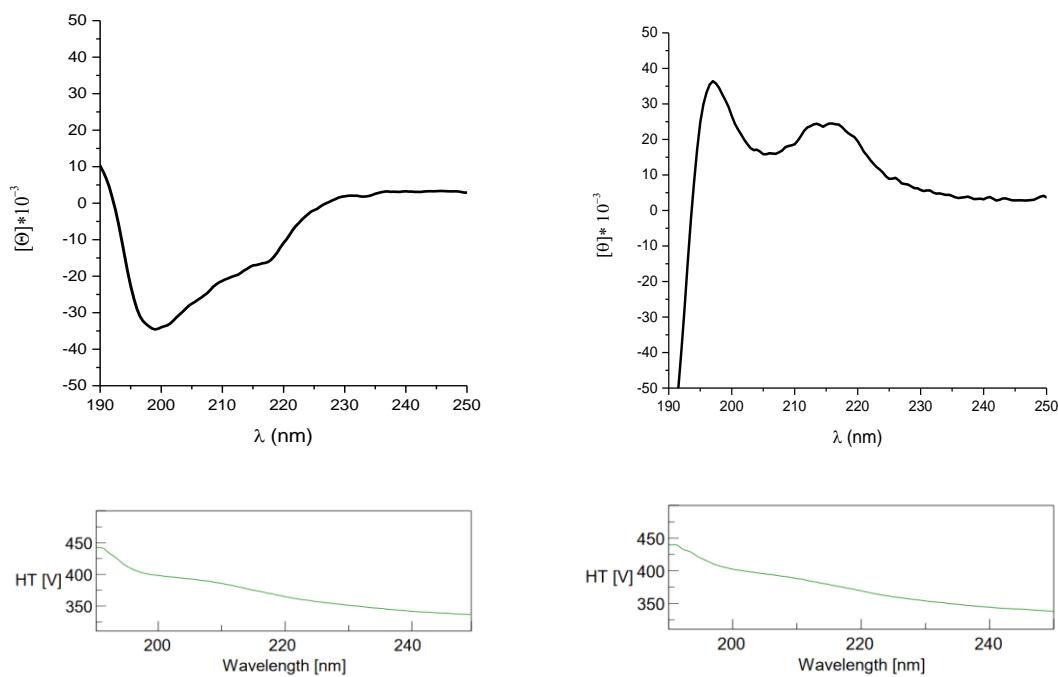

**Fig. S12.** CD spectra (top) and corresponding HT (bottom) of D-Phe-L-Val (left) and D-Val-L-Phe (right) in solution at 1 mM.



## S5. Thioflavin T fluorescence assay

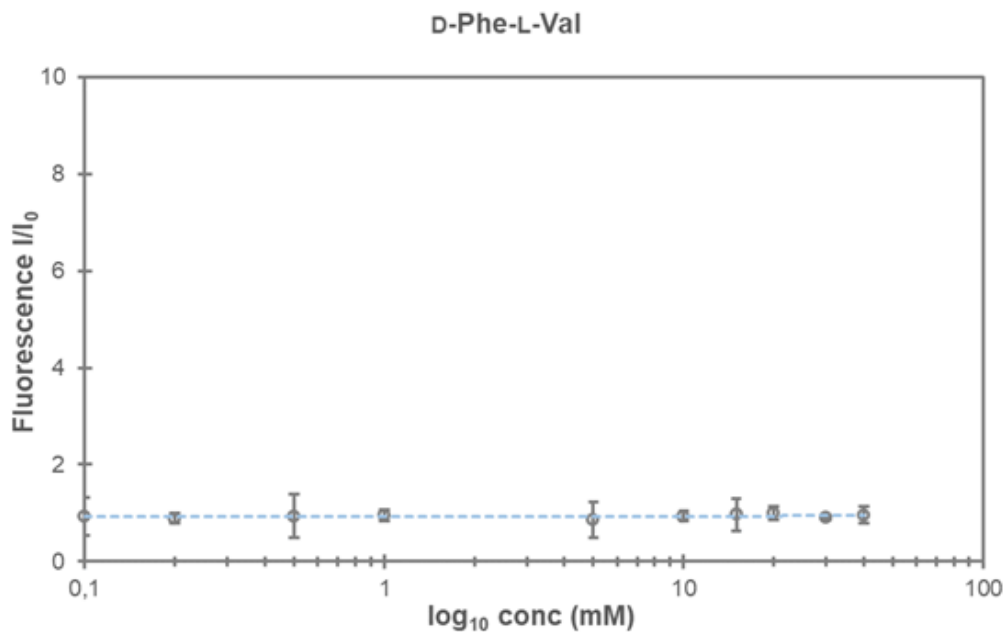

**Fig. S13.** Thioflavin T fluorescence assay for D-Phe-L-Val reveals lack of fluorescence with a signal intensity ( $I$ ) that is not significant different relative to the control without peptide ( $I_0$ ) across all concentrations tested, both in solution and gel phase ( $mgc = 40$  mM).

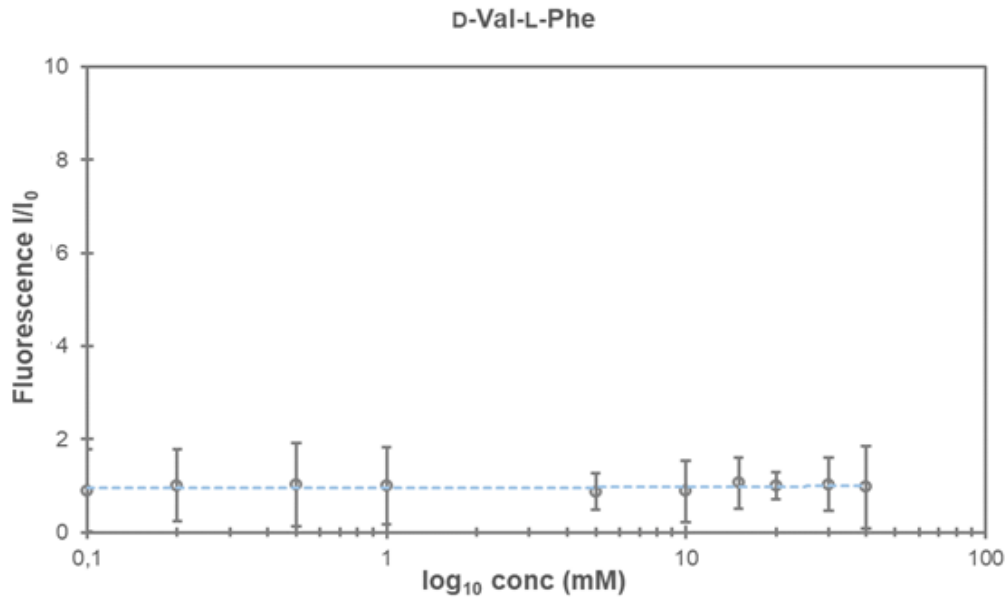

**Fig. S14.** Thioflavin T fluorescence assay for D-Val-L-Phe reveals lack of fluorescence with a signal intensity ( $I$ ) that is not significant different relative to the control without peptide ( $I_0$ ) across all concentrations tested.

## S6. Single-crystal XRD data

### D-Phe-L-Val (CCDC 2160978) and D-Val-L-Phe (CCDC 2160976).

Crystals of D-Phe-L-Val (CCDC 2160978) and D-Val-L-Phe (CCDC 2160976) were mounted on the diffractometer at the synchrotron Elettra, Trieste (Italy), beamline XRD1 and measured at 100 K. Data collection were performed using synchrotron radiation ( $\lambda = 0.7000 \text{ \AA}$ ) with the rotating crystal method ( $0.5^\circ/\text{image}$ ) for a total of 720 images. Data indexing were performed using MOSFLM,<sup>1</sup> while space groups were determined using POINTLESS.<sup>2</sup> The software AIMLESS<sup>3</sup> was used for scaling the data. The structures were solved using the software SHELXT<sup>4</sup> and refined through full matrix least-squares based on  $F^2$  using the program SHELXL<sup>5</sup> and OLEX2<sup>6</sup> as a GUI. For both crystal structures, non-hydrogen atoms were refined anisotropically, hydrogen atoms were positioned geometrically and included in structure factors calculations but not refined. In the case of D-Val-L-Phe crystal structure, it was possible to localise and refine the water molecules' hydrogen atoms. On the contrary, for the crystal structure of D-Phe-L-Val, it was not possible to do that or add them automatically.

ORTEP diagrams (**Figure S15**) were drawn using OLEX2. Crystallographic data and refinement details are reported in **Table S1**.

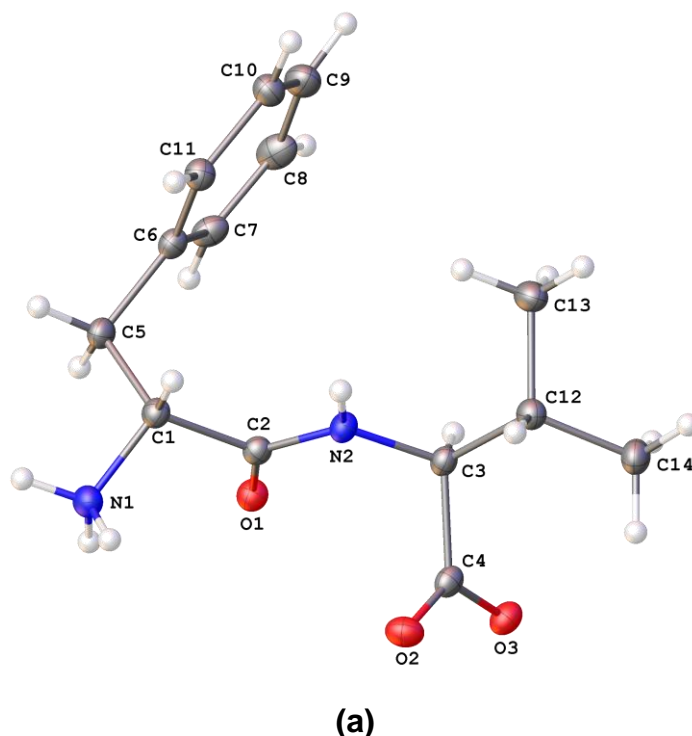

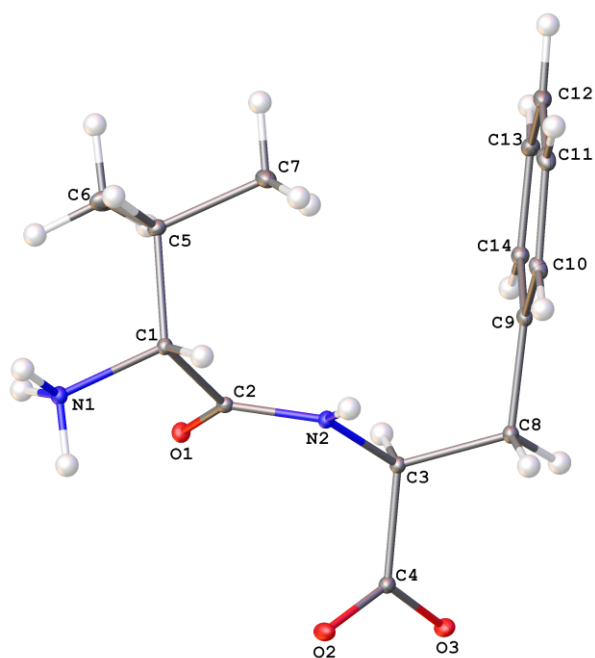

(b)

**Figure S15.** ORTEP diagrams of (a) D-Phe-L-Val (CCDC 2160978) and (b) D-Val-L-Phe (CCDC 2160976). Atom types: C grey, H white, O red, N blue. Ellipsoids are drawn at 20% probability level. Water molecules were omitted for clarity.

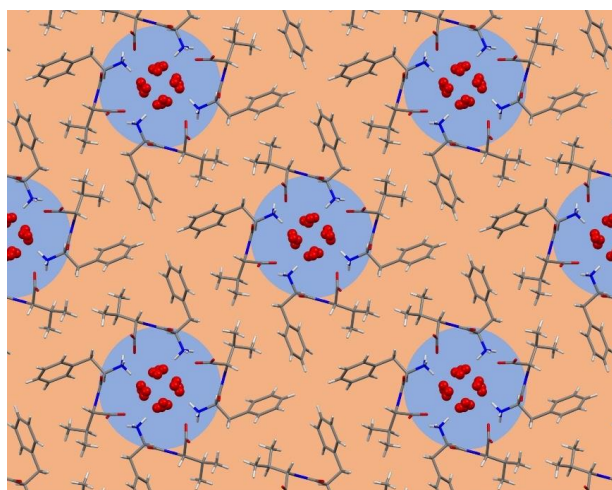

(a)

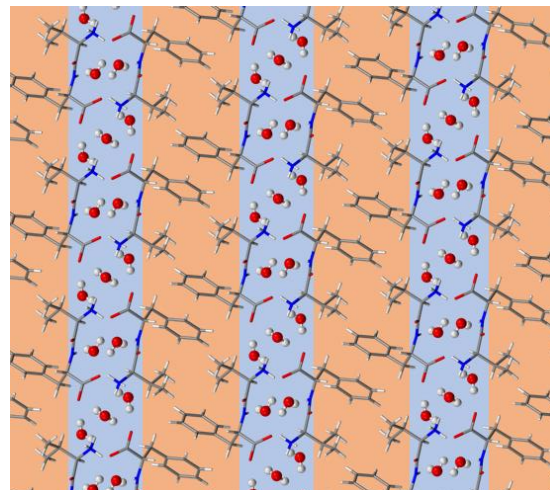

(b)

**Figure S16.** (a) The figure shows the water channels in the crystal structure of D-Phe-L-Val (shown in blue) surrounded by four dipeptides arranged head-to-tail. (b) Aniphathic layers in crystal structure of D-Val-L-Phe (hydrophilic regions with solvent molecules are shown in light blue and hydrophobic areas in pink). Atom types: C grey, H white, O red, N blue. Water molecules are depicted in ball-and-stick style.

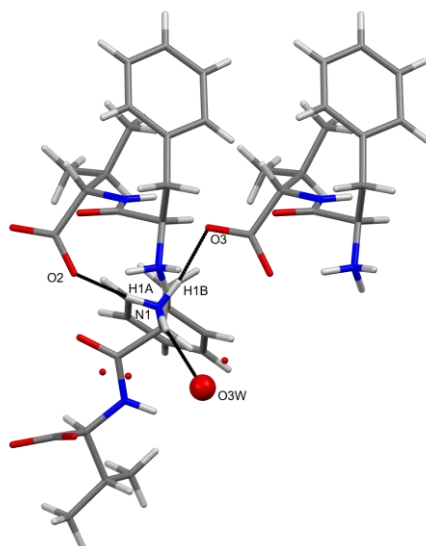

**Figure S17.** Typical hydrogen bond pattern of Phe-Phe dipeptide group. Only the interacting water molecule O3W is reported in ball-and-stick style.

**Table S1.** Crystallographic data and refinement details for the crystal structures of D-Phe-L-Val (CCDC 2160978) and D-Val-L-Phe (CCDC 2160976).

|                                                           | D-Phe-L-Val<br>(CCDC 2160978)                                                             | D-Val-L-Phe<br>(CCDC 2160976)                                                             |
|-----------------------------------------------------------|-------------------------------------------------------------------------------------------|-------------------------------------------------------------------------------------------|
| <b>T (K)</b>                                              | 100                                                                                       | 100                                                                                       |
| <b>Formula</b>                                            | 4(C <sub>14</sub> H <sub>20</sub> N <sub>2</sub> O <sub>3</sub> ),<br>4(H <sub>2</sub> O) | 2(C <sub>14</sub> H <sub>20</sub> N <sub>2</sub> O <sub>3</sub> ),<br>5(H <sub>2</sub> O) |
| <b>Formula weight</b>                                     | 1129.34                                                                                   | 618.72                                                                                    |
| <b>System</b>                                             | tetragonal                                                                                | monoclinic                                                                                |
| <b>Space group</b>                                        | <i>I</i> 4                                                                                | C2                                                                                        |
| <b>a (Å)</b>                                              | 22.947(3)                                                                                 | 19.615(4)                                                                                 |
| <b>b (Å)</b>                                              | 22.947(3)                                                                                 | 6.7520(14)                                                                                |
| <b>c (Å)</b>                                              | 5.6120(11)                                                                                | 13.402(3)                                                                                 |
| <b>α (°)</b>                                              | 90                                                                                        | 90                                                                                        |
| <b>β (°)</b>                                              | 90                                                                                        | 114.86(3)                                                                                 |
| <b>γ (°)</b>                                              | 90                                                                                        | 90                                                                                        |
| <b>V (Å<sup>3</sup>)</b>                                  | 2955.1(10)                                                                                | 1610.5(7)                                                                                 |
| <b>Z</b>                                                  | 2                                                                                         | 2                                                                                         |
| <b>D<sub>x</sub> (g cm<sup>-3</sup>)</b>                  | 1.260                                                                                     | 1.276                                                                                     |
| <b>λ (Å)</b>                                              | 0.70000                                                                                   | 0.70000                                                                                   |
| <b>μ (mm<sup>-1</sup>)</b>                                | 0.090                                                                                     | 0.095                                                                                     |
| <b>F<sub>000</sub></b>                                    | 1200.0                                                                                    | 668.0                                                                                     |
| <b>R1 (I &gt; 2σI)</b>                                    | 0.0661(2954)                                                                              | 0.0262(4354)                                                                              |
| <b>wR<sub>2</sub></b>                                     | 0.1921(4314)                                                                              | 0.0714(4372)                                                                              |
| <b>N. of param.</b>                                       | 140                                                                                       | 219                                                                                       |
| <b>GooF</b>                                               | 1.043                                                                                     | 1.065                                                                                     |
| <b>ρ<sub>min</sub>, ρ<sub>max</sub> (eÅ<sup>-3</sup>)</b> | -0.37, 0.53                                                                               | -0.27, 0.23                                                                               |
| <b>Restraints</b>                                         | /                                                                                         | /                                                                                         |

- [1] T. G. G. Battye, L. Kontogiannis, O. Johnson, H. R. Powell and A. G. W. Leslie, *Acta Crystallogr., Sect. D*, 2011, **67**, 271–281.
- [2] P. R. Evans, *Acta Crystallogr., Sect. D*, 2006, **62**, 72–82.
- [3] P. R. Evans and G. N. Murshudov, *Acta Crystallogr., Sect. D*, 2013, **69**, 1204–1214.
- [4] G. M. Sheldrick, *Acta Crystallogr., Sect. A*, 2015, **71**, 3–8.
- [5] G. M. Sheldrick, *Acta Crystallogr., Sect. C*, 2015, **71**, 3–8.
- [6] O. V. Dolomanov, L. J. Bourhis, R. J. Gildea, J. A. K. Howard and H. Puschmann, *J. Appl. Cryst.*, 2009, **42**, 339–341.

## S7. Oscillatory rheometry data

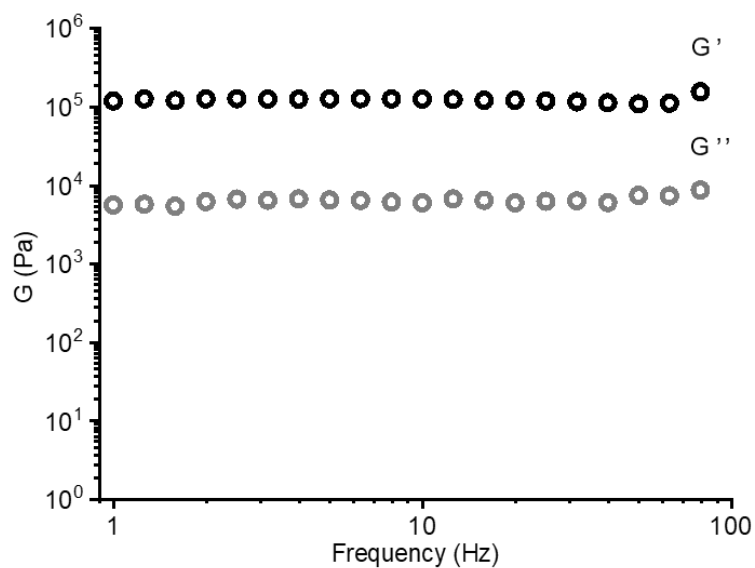

Fig. S18. Frequency sweep for D-Phe-L-Val at 40 mM.

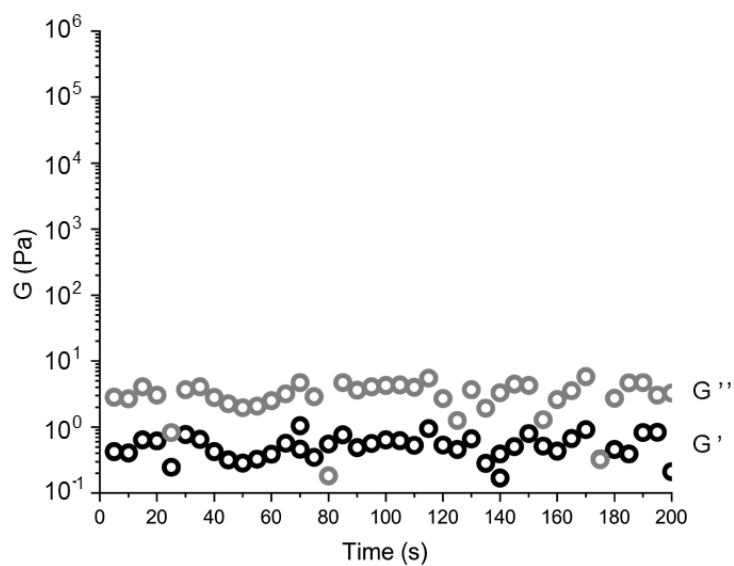

Fig. S19. Time sweep for D-Val-L-Phe at 40 mM.

## S8. Thermoreversibility test

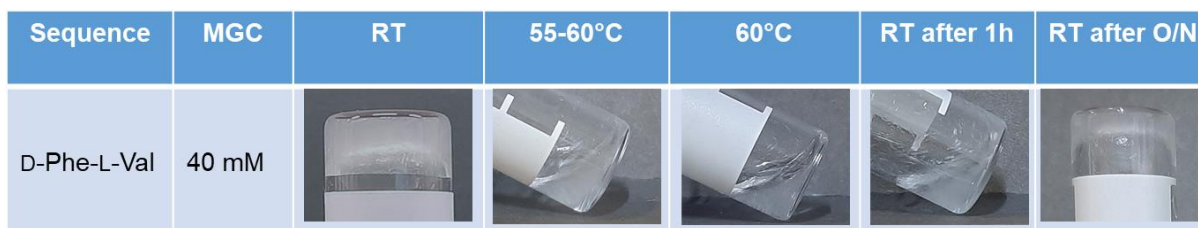

Fig. S20. Thermoreversibility test for D-Phe-L-Val hydrogel
